# Supplementary material for: PEGylated Liposomes Remotely Loaded with the Combination of Doxorubicin, Quinine, and Indocyanine Green Enable Successful Treatment of Multidrug-Resistant Tumors
Source: MDPI journal article supplement (doi:10.3390/pharmaceutics13122181), 2021-12-17
Supplement: s1 [file s1]

# Supplementary Materials: PEGylated Liposomes Remotely Loaded With the Combination of Doxorubicin, Quinine, and Indocyanine Green Enable Successful Treatment of Multidrug-Resistant Tumors

Emma Grabarnick (Portnoy), Alexander V. Andriyanov , Hadas Han, Sara Eyal and Yechezkel Barenholz

**Table S1.** Melting points measured by DSC expressed as the mean temperature in °C ± STD.

| Liposome Type | Tm 1 (°C)  | Tm 2 (°C)  |
|---------------|------------|------------|
| PLD           | 52.8 ± 0.2 | 68.6 ± 0.8 |
| PLDQ          | 50.4 ± 0.1 | 64.1 ± 0.5 |
| Quinine       | 50.0 ± 0.2 |            |
| Lip           | 48.1 ± 0.4 |            |

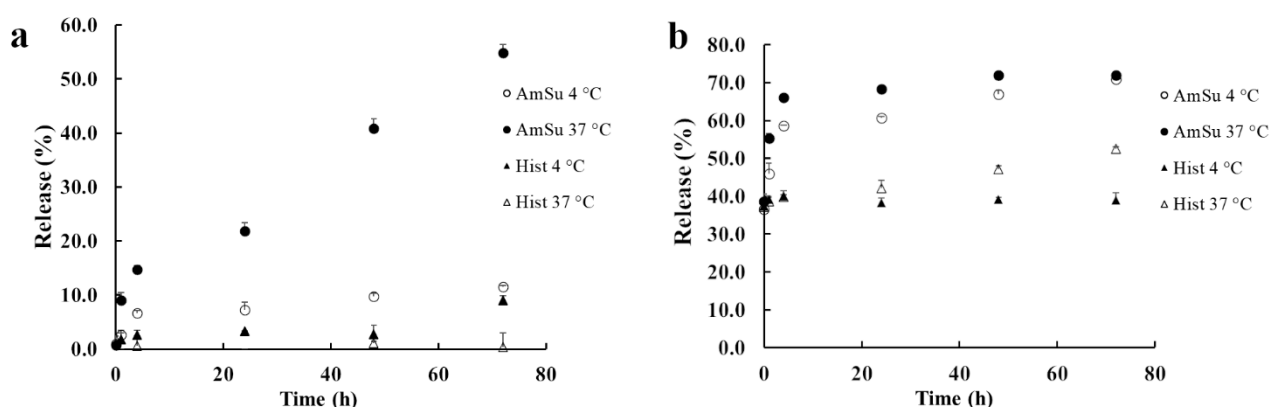

**Figure S1.** Release of Doxorubicin and quinine from liposomes. (a) Release of Doxorubicin from liposomes at 4 °C and 37 °C in histidine (50 mM) and ammonium sulfate (10 mM) buffers. (b) Release of quinine from liposomes at 4 °C and 37 °C.

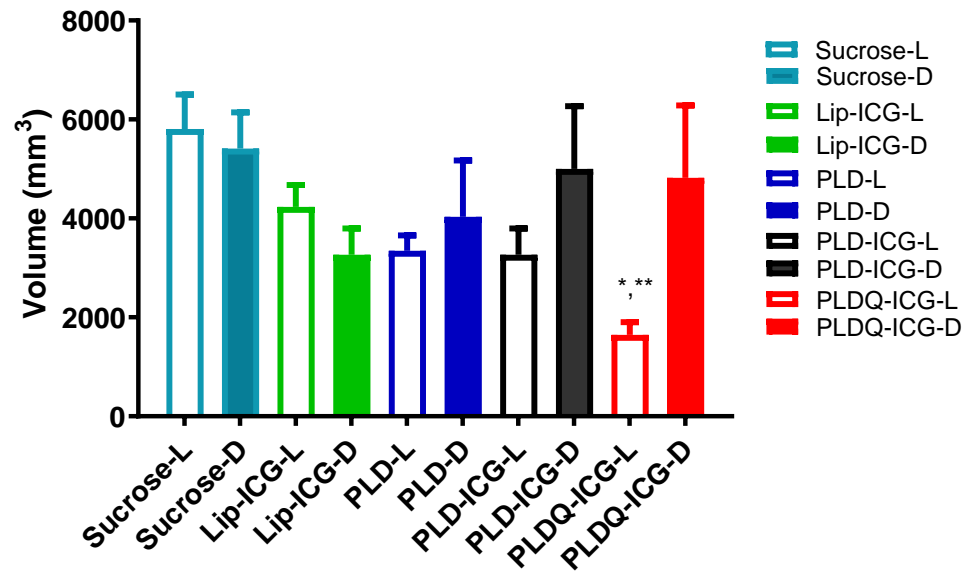

**Figure S2.** AUC of tumor volume curves. \*  $p < 0.05$  compared to Sucrose D, PLD-ICG-D, PLDQ-ICG-D, \*\*  $p < 0.01$  compared to Sucrose L.  $n = 6-8$ . Values represent mean  $\pm$  SE. 2-way ANOVA with Tukey Multiple Comparisons Test.

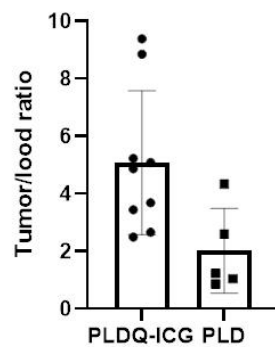

**Figure S3.** Doxorubicin emission in tumors, ex-vivo.

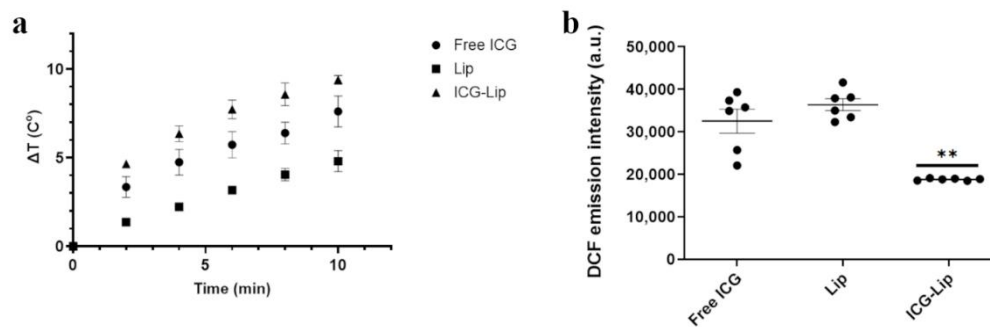

**Figure S4.** (a) Temperature difference measurement as a function of time. (b) Reactive oxygen species treatment measurement by DCF dye. \*\*  $p < 0.01$ . 2-way ANOVA with Tukey Multiple Comparisons Test.

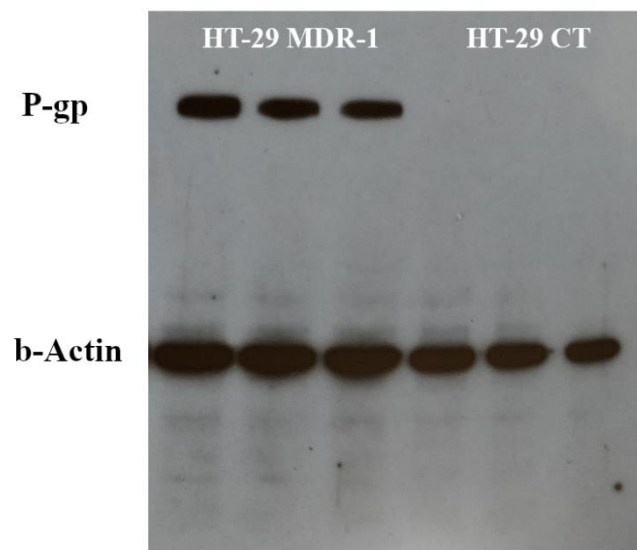

**Figure S5.** Western blot for HT-29 and HT 29 MDR1 cells showing expression of P-gp and beta-actin.
